# Supplementary material for: Extensive innate immune gene activation accompanies brain aging, increasing vulnerability to cognitive decline and neurodegeneration: a microarray study
Source: J Neuroinflammation. 2012 Jul 23;9:179. doi: 10.1186/1742-2094-9-179 (PMC3419089; doi:10.1186/1742-2094-9-179)
Supplement: Additional file 6 — Table S6. Relative expression values for chemokine genes and associated probe sets. [file 1742-2094-9-179-S6.xlsx]

## Sheet: Sheet1
TABLE 6	Relative expression values for chemokine genes and associated probesests
6A. Aging			EC			HC			PCG			SFG
Gene	Description	Probe ID	young	aged	p<0.01	young	aged	p<0.01	young	aged	p<0.01	young	aged	p<0.01
CCR1	Chemokine (C-C motif) receptor 1	205098_at	1	1.67667		1	2.82461	p<0.01	1	2.29179	p<0.01	1	1.67474
CCR1	chemokine (C-C motif) receptor 1	205099_s_at	1	1.32673		1	1.93804	p<0.01	1	1.5394	p<0.01	1	1.30309
CX3CL1	chemokine (C-X3-C motif) ligand 1	203687_at	1	0.536174		1	0.683511		1	0.389622	p<0.01	1	0.388952	p<0.01
CX3CL1	chemokine (C-X3-C motif) ligand 1	823_at	1	0.533208	p<0.01	1	0.683977	p<0.01	1	0.438145	p<0.01	1	0.419813	p<0.01
CX3CR1	chemokine (C-X3-C motif) receptor 1	1568934_at	1	0.583111		1	0.494609		1	0.719133		1	0.707709
CX3CR1	chemokine (C-X3-C motif) receptor 1	205898_at	1	1.28996		1	1.59236		1	1.43743		1	0.967374
CXCL1	chemokine (C-X-C motif) ligand 1	204470_at	1	1.1834		1	1.86802		1	1.1622		1	1.20099
CXCL2	chemokine (C-X-C motif) ligand 2	209774_x_at	1	0.990234		1	2.16026		1	1.14033		1	1.30711
CXCL5	chemokine (C-X-C motif) ligand 5	214974_x_at	1	1.20915		1	1.64891	p<0.01	1	0.977309		1	1.01865
CXCL10	chemokine (C-X-C motif) ligand 10	204533_at	1	0.83016		1	0.856662		1	0.906063		1	0.882602
CXCL12	chemokine (C-X-C motif) ligand 12	203666_at	1	0.769472		1	0.691306	p<0.01	1	0.730611		1	0.805858
CXCL14	chemokine (C-X-C motif) ligand 14	218002_s_at	1	0.543263		1	0.72269		1	0.572322		1	0.736676
CXCL14	chemokine (C-X-C motif) ligand 14	222484_s_at	1	0.603643		1	0.742899		1	0.57632		1	0.704786
CXCL16	chemokine (C-X-C motif) ligand 16	223454_at	1	1.53961		1	2.00642	p<0.01	1	1.78924	p<0.01	1	1.44127	p<0.01
6B. Continuum and AD			EC					HC					PCG					SFG
Gene	Description	PROBE ID	young	aged	AD	significance		young	aged	AD	significance		young	aged	AD	significance		young	aged	AD	significance
						A	B				A	B				A	B				A	B
CCR1	Chemokine (C-C motif) receptor 1	205098_at	1	1.67667	2.28658			1	2.82461	3.0224			1	2.29179	2.59765			1	1.67474	2.06767
CCR1	chemokine (C-C motif) receptor 1	205099_s_at	1	1.32673	1.72586			1	1.93804	1.86496			1	1.5394	1.46158			1	1.30309	1.65842
CX3CL1	chemokine (C-X3-C motif) ligand 1	203687_at	1	0.536174	0.526292			1	0.683511	0.424897	p<0.01	#	1	0.389622	0.405083			1	0.388952	0.356194
CX3CL1	chemokine (C-X3-C motif) ligand 1	823_at	1	0.533208	0.530884			1	0.683977	0.424797	p<0.01	#	1	0.438145	0.467073			1	0.419813	0.382542
CX3CR1	chemokine (C-X3-C motif) receptor 1	1568934_at	1	0.583111	0.729152			1	0.494609	0.568661			1	0.719133	0.649808			1	0.707709	0.761967
CX3CR1	chemokine (C-X3-C motif) receptor 1	205898_at	1	1.28996	1.26266			1	1.59236	1.18499			1	1.43743	1.03253			1	0.967374	0.837347
CXCL1	chemokine (C-X-C motif) ligand 1	204470_at	1	1.1834	1.45027			1	1.86802	1.60456			1	1.1622	1.71702			1	1.20099	1.81289
CXCL2	chemokine (C-X-C motif) ligand 2	209774_x_at	1	0.990234	1.54932			1	2.16026	2.39655			1	1.14033	1.49675			1	1.30711	1.26702
CXCL5	chemokine (C-X-C motif) ligand 5	214974_x_at	1	1.20915	1.20507			1	1.64891	1.49943			1	0.977309	1.04425			1	1.01865	1.23371
CXCL10	chemokine (C-X-C motif) ligand 10	204533_at	1	0.83016	1.13395			1	0.856662	1.22563			1	0.906063	1.17722			1	0.882602	1.20036
CXCL12	chemokine (C-X-C motif) ligand 12	203666_at	1	0.769472	0.783008			1	0.691306	0.739609			1	0.730611	0.613112			1	0.805858	0.695689
CXCL14	chemokine (C-X-C motif) ligand 14	218002_s_at	1	0.543263	0.63481			1	0.72269	0.39251	p<0.01		1	0.572322	0.555132			1	0.736676	0.626161
CXCL14	chemokine (C-X-C motif) ligand 14	222484_s_at	1	0.603643	0.60653			1	0.742899	0.414952	p<0.01		1	0.57632	0.538486			1	0.704786	0.585249
CXCL16	chemokine (C-X-C motif) ligand 16	223454_at	1	1.53961	2.01676	p<0.01		1	2.00642	2.41448			1	1.78924	2.01063			1	1.44127	2.00727	p<0.01	#
A: indicates significant continuum across young, aged, AD (p<0.01)
B: # indicates significant in AD versus age-matched controls (p<0.01)
